# Supplementary material for: Comunicación en red y tendencias de cambio en las culturas políticas
Source: Oxford University Press journal article supplement (doi:10.1242/dev.115642), 2014-01-01
Supplement: dev115642supp.pdf [file dev115642supp.pdf]

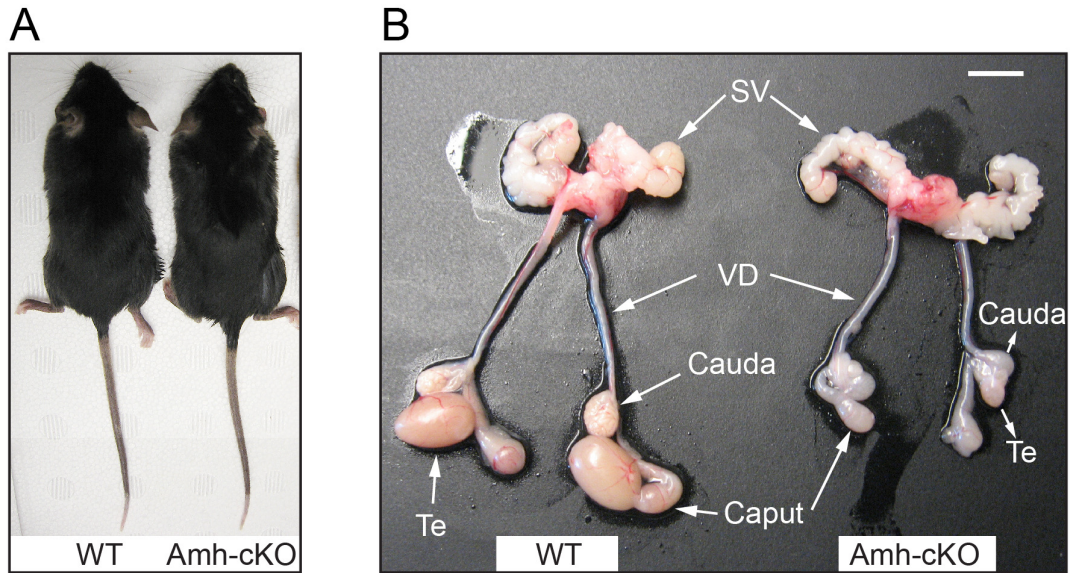

**Fig. S1. Body size and gross morphology of the reproductive tract of WT and Amh-cKO mice at P60.** (A) A representative image showing that WT and Amh-cKO male mice displayed similar body size at P60. (B) Representative gross morphology of the reproductive tract of WT and Amh-cKO mice. SV, seminal vesicle; VD, vas deferens; Te, testis; Cauda, cauda epididymis; Caput, Caput epididymis. Scale bar = 1cm.

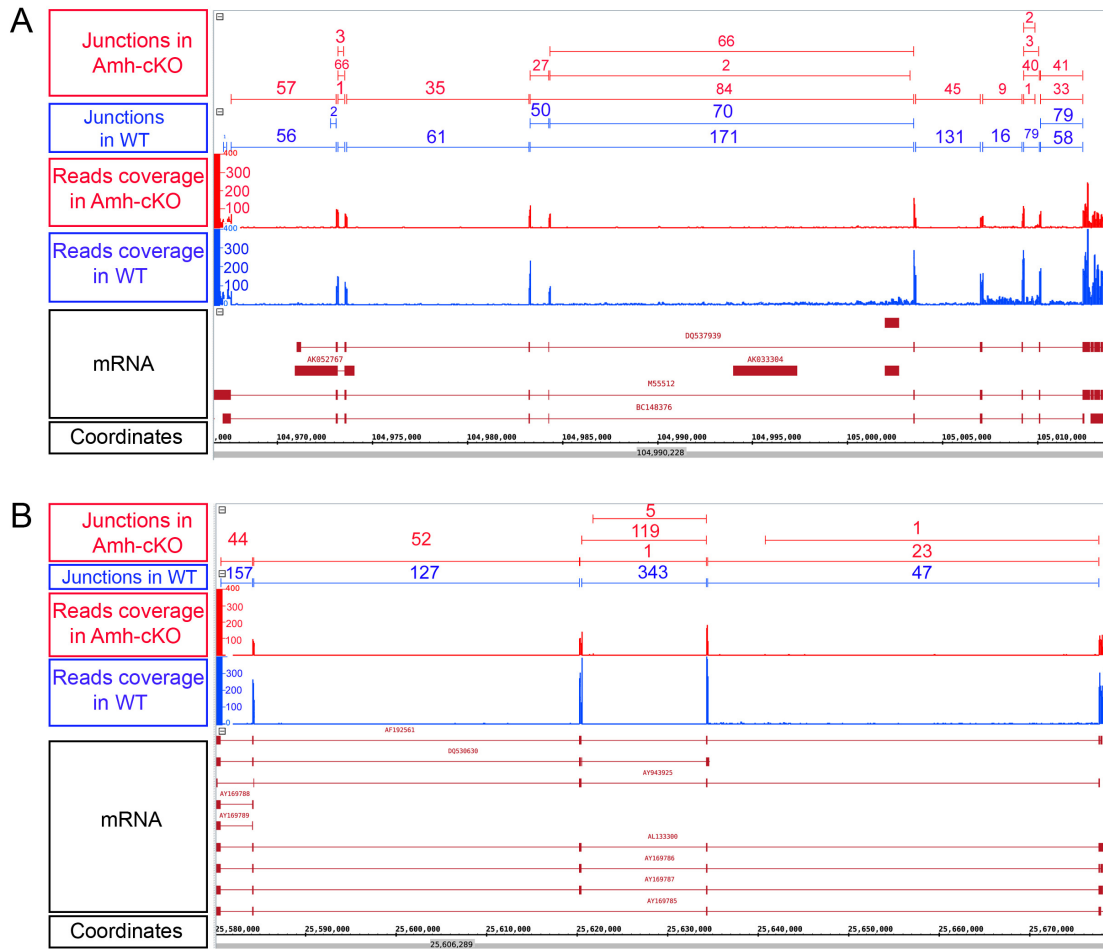

**Fig. S2. Altered alternative splicing in *Wt1* and *Dmrt1* transcripts.** (A) Comparison of alternative splicing patterns for *Wt1* between WT and Amh-cKO testes at P4. (B) Comparison of alternative splicing patterns for *Dmrt1* between WT and Amh-cKO testes at P4. X-axis denotes the genomic coordinates. Representative mRNA transcripts were from the Ensemble database and the read coverage is as indicated. The numerals above the lines connecting exons represent the total number of reads encompassing that exon-exon junction, as detected by RNA-seq analyses.

**SUPPLEMENTARY TABLES**

**Table S1**

[Click here to Download Table S1](#)

**Table S2**

[Click here to Download Table S2](#)

**Table S3**

[Click here to Download Table S3](#)
